# Supplementary material for: Drawing and the dynamic nature of living systems
Source: eLife journal article supplement (doi:10.7554/elife.46962), 2019-03-27
Supplement: supp1 [file elife-46962-supp1-v1.pdf]

tense

go!

burst (MTs)

grow (MTs)

expand/shrink (MTs)

nucleate/birth (MTs)

wave (MTs)

explore (MTs)

probe (MTs)

speckle (MTs)

offshoot (MTs)

align (MTs)

bundle (MTs)

slide (MTs)

coalesce (MTs)

focus (MTs)

flux (MTs)

flow (MTs)

mirror (MTs)

condense (chromosomes)

inhale (chromosomes)

tight (chromosomes)

touch (MTs and chromosomes)

kiss (MTs and chromosomes)

join (MTs and chromosomes)

co-ordinate (MTs and chromosomes)

dance (MTs and chromosomes)

align (MTs and chromosomes)

balance (MTs and chromosomes)

separate (MTs and chromosomes)

climax (MTs and chromosomes)

expend (MTs and chromosomes)

cleave (chromosomes)

shorten (MTs)

echo (MTs)

final pulse (MTs)

exhale (chromosomes)

relax (chromosomes)

decondense (chromosomes)

satisfied

rest
